# Supplementary material for: Oil-Incorporated Poly(Lactic Acid) as an Alternative Material for Orthodontic Base Plate: A 3D Printing Approach
Source: Hindawi journal article supplement (doi:10.1155/2022/7448575), 2022-08-25
Supplement: f1 [file 7448575.f1.docx]

**SUPPLEMENTARY MATERIAL**

**Oil-incorporated poly(lactic acid) as an alternative material for orthodontic base plate: A 3-D printing approach**

Niha Naveed,1 Kingshuk Dutta,2,* D. Balamurugan,2 Amruth V. Haveri,2 Kannan Sabapathy1

1Department of Orthodontics and Dentofacial Orthopedics, Sree Balaji Dental College and Hospital, Chennai – 600100, India

2Advanced Polymer Design and Development Research Laboratory (APDDRL), School for Advanced Research in Petrochemicals (SARP), Central Institute of Petrochemicals Engineering and Technology (CIPET), Bengaluru – 562149, India

**Correspondence**

*Kingshuk Dutta, Advanced Polymer Design and Development Research Laboratory (APDDRL), School for Advanced Research in Petrochemicals (SARP), Central Institute of Petrochemicals Engineering and Technology (CIPET), Bengaluru – 562149, India

E-mail: kingshukdutta.pst@gmail.com

**Figures**


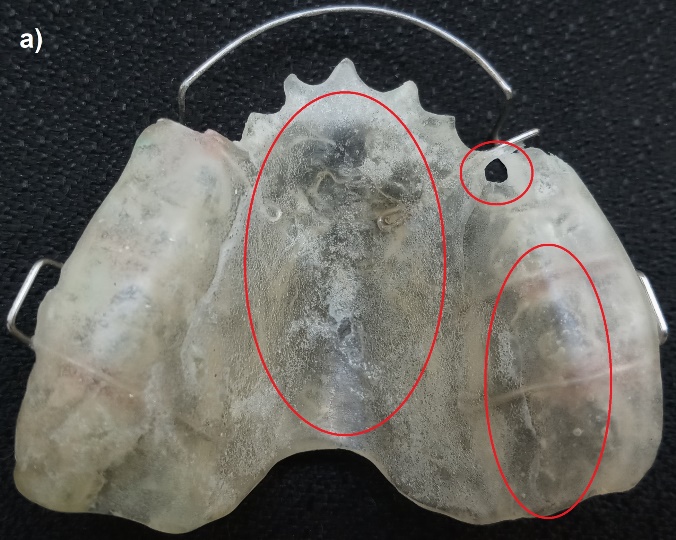

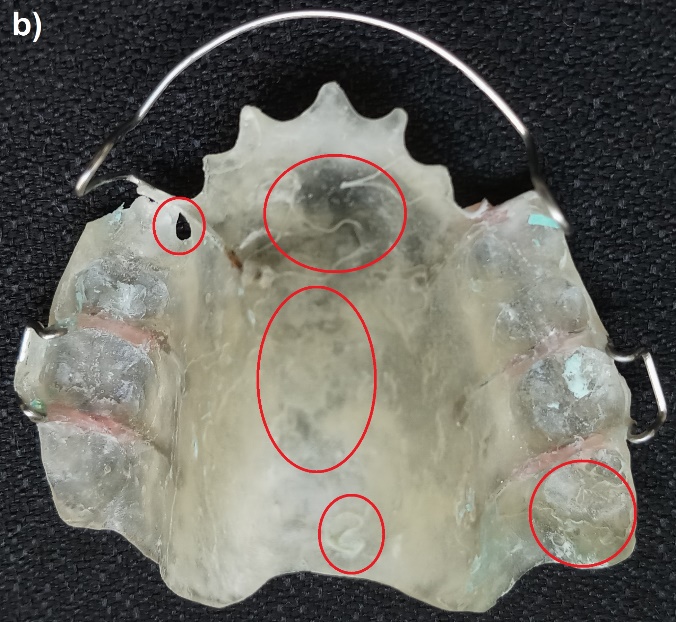


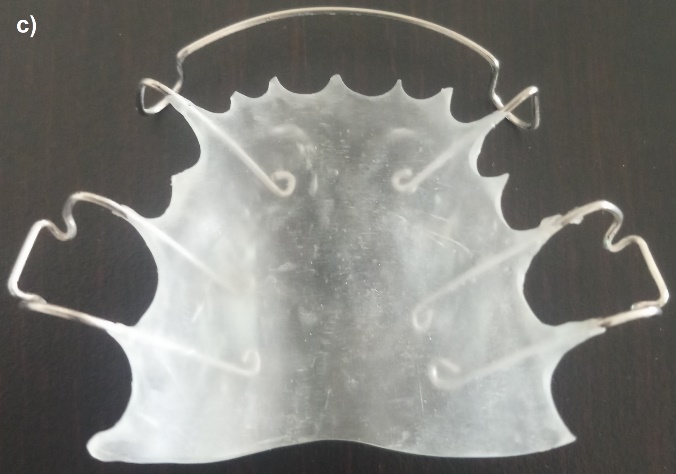

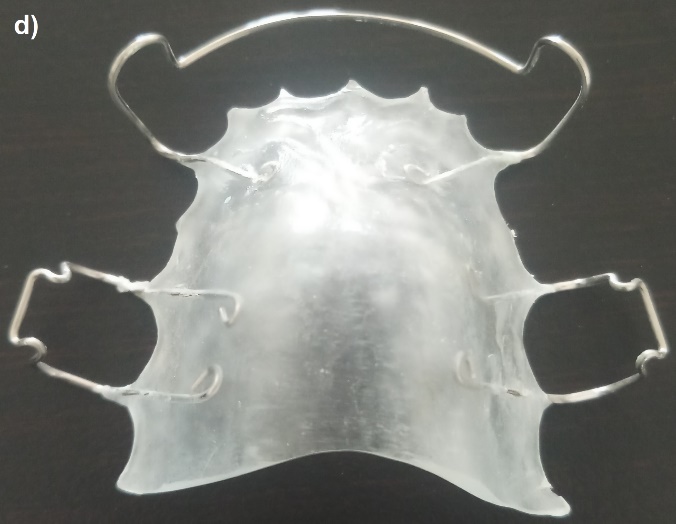


**Figure S1.** Structural defects, dimensional imperfections and non-uniformity present in conventional PMMA-based OBPs.


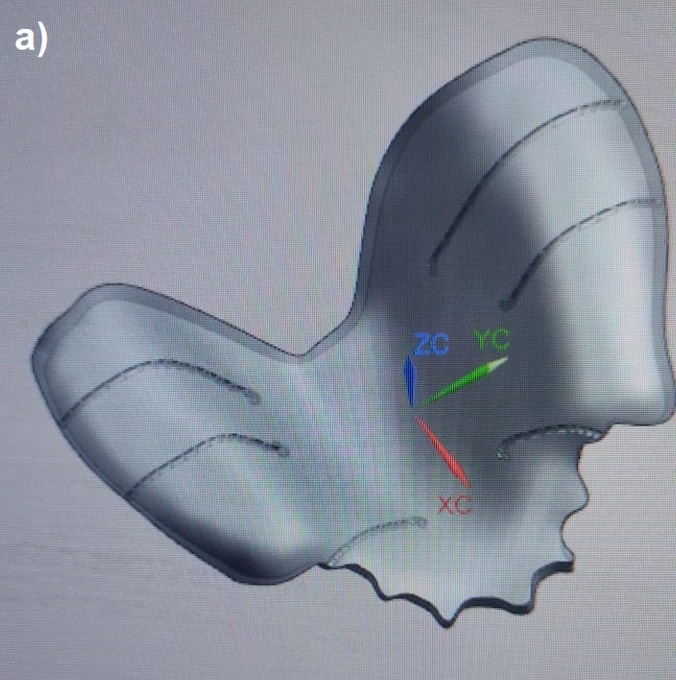

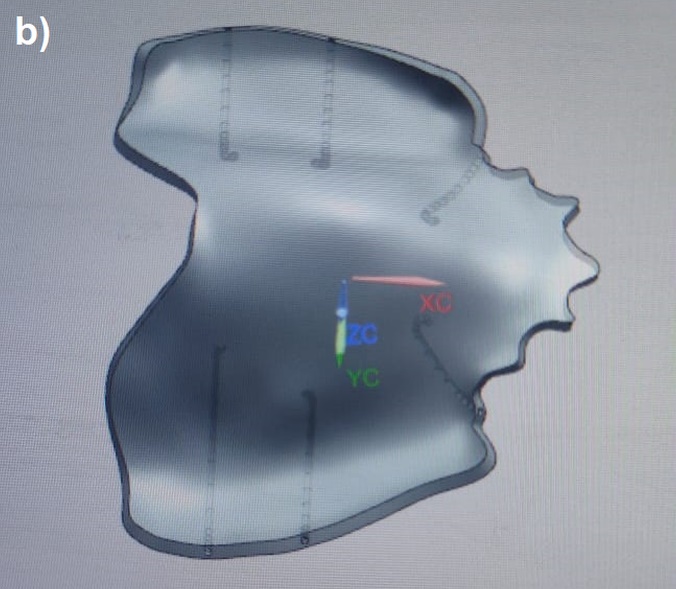


**Figure S2.** 3D scan image obtained from the conventional PMMA OBP and used for the 3D-printing of the PLA OBP.
